# Supplementary material
Source: PubMed Central journal article supplement (PMC1794314)

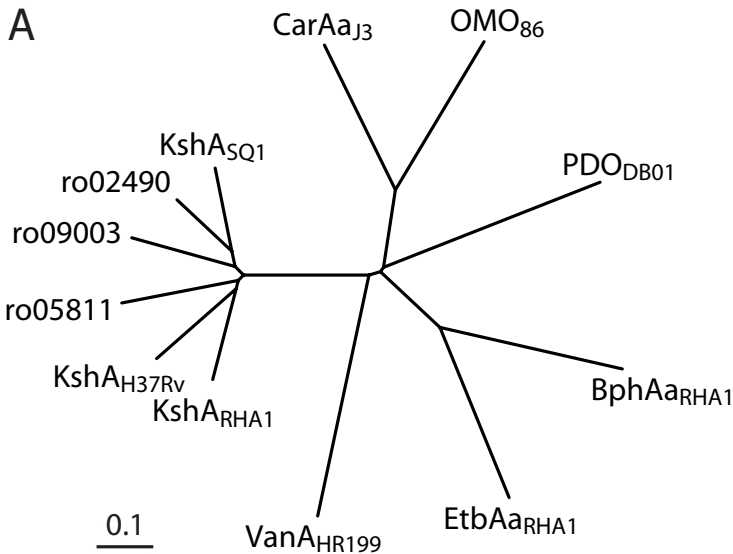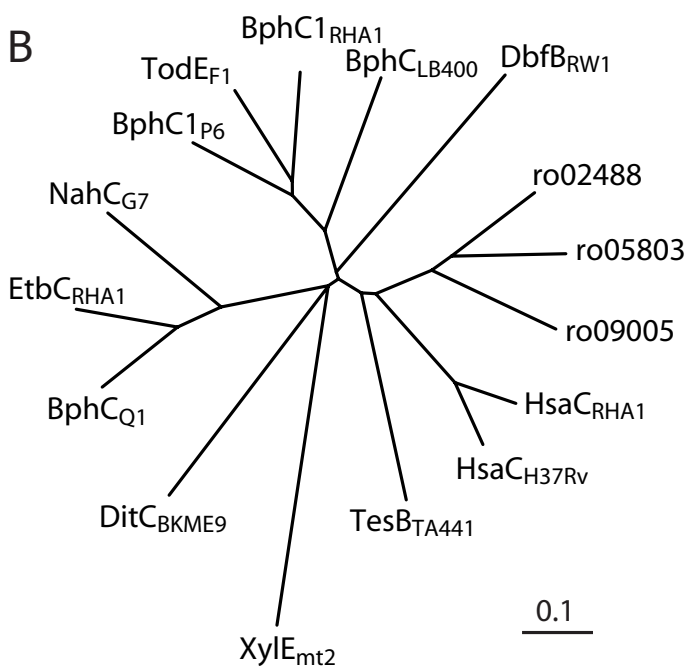

Supplement: pnas_0605728104_1.pdf [file pnas_0605728104_1.pdf]

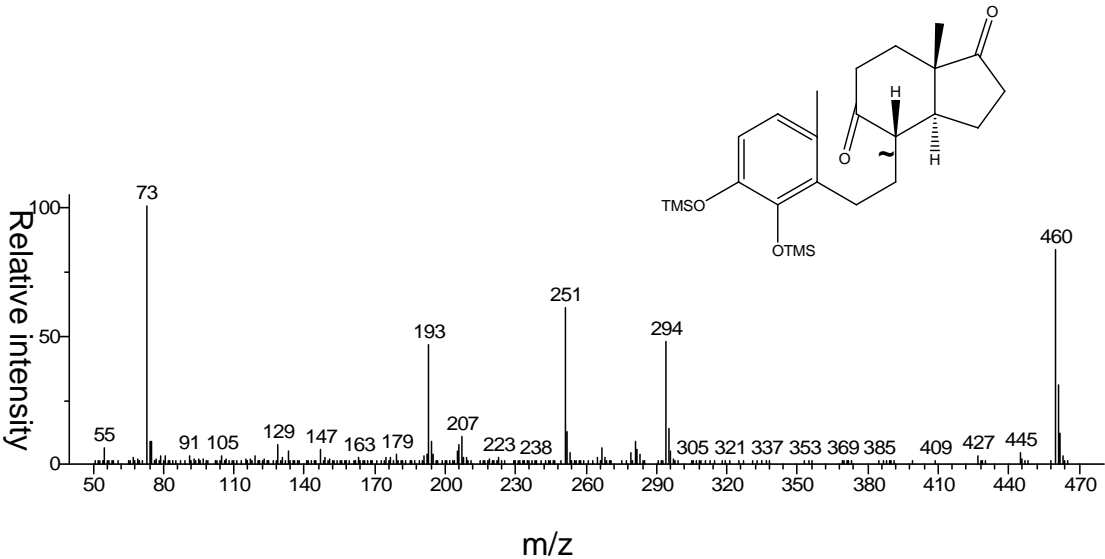

Supplement: pnas_0605728104_2.pdf [file pnas_0605728104_2.pdf]
